# Supplementary material
Source: MDPI journal article supplement (https://www.mdpi.com/2071-1050/15/21/15654)
Supplement: s1 [file s1]

## Supplementary Materials

Table S1. Characteristics of the environmental assessments carried out in the reviewed studies

| Source | Assessment method | Standards / Guidelines                          | Type of data          | Data quality assessment? | Software                                                    | No. of impact categories                        | Impact assessment method                                                                                                                  | Allocation method | Sensitivity analysis                                                 |
|--------|-------------------|-------------------------------------------------|-----------------------|--------------------------|-------------------------------------------------------------|-------------------------------------------------|-------------------------------------------------------------------------------------------------------------------------------------------|-------------------|----------------------------------------------------------------------|
| [103]  | LCA               | Not specified                                   | Not specified         | No                       | Not specified                                               | 1                                               | Not specified                                                                                                                             | Not specified     | No                                                                   |
| [104]  | LCA               | ISO 14040                                       | Primary and secondary | No                       | SimaPro 8.4                                                 | 3 (endpoint)                                    | ReCiPe 2016 Endpoint (E) V1.00                                                                                                            | Not specified     | No                                                                   |
| [105]  | LCA               | Not specified                                   | Not specified         | No                       | ECO-comparator applied to Road Construction and Maintenance | 12                                              | Not specified                                                                                                                             | Not specified     | No                                                                   |
| [106]  | LCA               | ISO 14040<br>ISO 14044                          | Secondary             | No                       | Not specified                                               | 2                                               | Not specified                                                                                                                             | Cut-off           | No                                                                   |
| [113]  | LCA               | ISO 14040<br>EN 15804<br>prEN 17392 (withdrawn) | Primary and secondary | No                       | Not specified                                               | 2                                               | Not specified                                                                                                                             | Not specified     | Service life of layers, production temperature of - modified asphalt |
| [114]  | LCA               | ISO 14040                                       | Secondary             | No                       | Not specified                                               | 6                                               | Tool for the Reduction and Assessment of Chemical and other Environmental Impacts (TRACI) – including normalization and weighting factors | Not specified     | No                                                                   |
| [115]  | LCA               | Not specified                                   | Primary and secondary | No                       | Not specified                                               | 2 - emissions are calculated instead of impacts | No impacts are calculated                                                                                                                 | Not specified     | No                                                                   |

| Source | Assessment method                            | Standards / Guidelines | Type of data  | Data quality assessment? | Software                           | No. of impact categories                        | Impact assessment method                                                                            | Allocation method | Sensitivity analysis                                                                                     |
|--------|----------------------------------------------|------------------------|---------------|--------------------------|------------------------------------|-------------------------------------------------|-----------------------------------------------------------------------------------------------------|-------------------|----------------------------------------------------------------------------------------------------------|
| [116]  | TBL-LCA based on Economic Input/Output (EIO) | Not specified          | Secondary     | No                       | Not specified                      | 10                                              | Does not apply                                                                                      | Does not apply    | Rate of WMA additives, transport distance of pavement materials to mixing sites and mixing energy amount |
| [117]  | TBL-LCA based on Economic Input/Output (EIO) | Not specified          | Not specified | No                       | Not specified                      | 10                                              | Does not apply                                                                                      | Does not apply    | No                                                                                                       |
| [119]  | LCA                                          | Not specified          | Secondary     | No                       | SimaPro                            | 13                                              | Not specified                                                                                       | Not specified     | No                                                                                                       |
| [120]  | LCA                                          | Not specified          | Not specified | No                       | SimaPro                            | 10                                              | Tool for Reduction and Assessment of Chemicals and Other Environmental Impacts (TRACI)              | Not specified     | No                                                                                                       |
| [121]  | LCA                                          | Not specified          | Not specified | No                       | Suggested - SimaPro, OpenLCA, GaBi | 9                                               | CML 2001 Cumulative Energy Demand (CED) ReCiPe hierarchist                                          | Not specified     | Yes - in combined results                                                                                |
| [122]  | LCA                                          | Not specified          | Secondary     | No                       | Not specified                      | 3 - emissions are calculated instead of impacts | No impacts are calculated                                                                           | Not specified     | No                                                                                                       |
| [123]  | LCA                                          | Not specified          | Secondary     | No                       | Not specified                      | 3 - emissions are calculated instead of impacts | No impacts are calculated                                                                           | Not specified     | No                                                                                                       |
| [127]  | LCA                                          | Not specified          | Secondary     | No                       | Not specified                      | Not specified                                   | Not specified - it was highlighted that normalization and weighting of results shall be carried out | Not specified     | No                                                                                                       |

| Source | Assessment method | Standards / Guidelines | Type of data | Data quality assessment? | Software      | No. of impact categories | Impact assessment method                                                                | Allocation method | Sensitivity analysis |
|--------|-------------------|------------------------|--------------|--------------------------|---------------|--------------------------|-----------------------------------------------------------------------------------------|-------------------|----------------------|
| [126]  | LCA               | UNEP/SETAC guideline   | Secondary    | No                       | Not specified | 5                        | Tool Reduction and Assessment of Chemical and other environmental Impacts 2.0-TRACI 2.0 | Not specified     | No                   |
| [125]  | LCA               | Not specified          | Secondary    | Yes – Data Quality Index | Not specified | 6                        | Tool Reduction and Assessment of Chemical and other environmental Impacts 2.0-TRACI 2.0 | Not specified     | No                   |

Table S2. Characteristics of the economic assessments carried out in the reviewed studies

| Source | Assessment method           | Standards / Guidelines                                           | Stakeholder(s)       | Data type             | Software        | No. of indicators | Discount rate | Externalities?                                         | Sensitivity analysis                                                                                                                        |
|--------|-----------------------------|------------------------------------------------------------------|----------------------|-----------------------|-----------------|-------------------|---------------|--------------------------------------------------------|---------------------------------------------------------------------------------------------------------------------------------------------|
| [103]  | LCC                         | Not specified                                                    | Not specified        | Not specified         | Not specified   | 2                 | Not specified | Not specified                                          | No                                                                                                                                          |
| [104]  | LCC                         | Cost breakdown by the American Society for Testing and Materials | Not specified        | Not specified         | Microsoft Excel | 1                 | Not specified | Not specified                                          | No                                                                                                                                          |
| [105]  | LCC                         | Not specified                                                    | Not specified        | Not specified         | Not specified   | 1                 | Not specified | Not specified                                          | Not specified                                                                                                                               |
| [106]  | Cost-Benefit Analysis (CBA) | Cost Benefit Guidelines of the EU-Commission                     | Road agency          | Secondary             | Not specified   | 1                 | 4%            | Yes<br>Indirect costs - environmental and social costs | No                                                                                                                                          |
| [113]  | LCC                         | EN 15643-4 (withdrawn)<br>ISO 15686-5                            | Not specified        | Primary and secondary | Not specified   | 1                 | 3%            | Not specified                                          | Yes - Discount rate                                                                                                                         |
| [114]  | LCC                         | Not specified                                                    | Road agency<br>Users | Secondary             | RealCost 2.5    | 1                 | 4%            | No                                                     | Yes - discount rate, queue dissipation capacity, value of time for passenger cars and trucks, work zone capacity, agency construction costs |

| Source | Assessment method                                                     | Standards / Guidelines        | Stakeholder(s)    | Data type             | Software                     | No. of indicators | Discount rate                                   | Externalities?                                 | Sensitivity analysis                                                                     |
|--------|-----------------------------------------------------------------------|-------------------------------|-------------------|-----------------------|------------------------------|-------------------|-------------------------------------------------|------------------------------------------------|------------------------------------------------------------------------------------------|
| [115]  | LCC                                                                   | Not specified                 | Road agency Users | Primary and secondary | Not specified                | 3                 | Six discount rates: 8%, 20%, 30%, 35%, 40%, 50% | No                                             | Yes - Increase in fuel price, discount rate, traffic growth factor and construction cost |
| [116]  | TBL-LCA based on Economic Input/Output (EIO)                          | Not specified                 | Not specified     | Not specified         | Does not apply               | 3                 | Does not apply                                  | Does not apply                                 | No                                                                                       |
| [117]  | TBL-LCA based on Economic Input/Output (EIO)                          | Not specified                 | Not specified     | Primary               | Not specified                | 3                 | Does not apply                                  | Does not apply                                 | Yes<br>Same as in environmental                                                          |
| [119]  | LCC                                                                   | Not specified                 | Road agency       | Primary and secondary | Not specified                | 1                 | None was used                                   | No                                             | No                                                                                       |
| [120]  | LCC                                                                   | Not specified                 | Not specified     | Not specified         | Not specified                | Not specified     | Not specified                                   | Yes<br>Indirect costs - social costs of carbon | No                                                                                       |
| [121]  | LCC                                                                   | Bids, authorities' guidelines | Road agency Users | Secondary             | HCM, RealCost, QUADRO, Visum | 1                 | Not specified                                   | No                                             | Yes - in combined results                                                                |
| [122]  | Evaluation of economic opportunity and value of transportation assets | Not specified                 | Not specified     | Secondary             | Not specified                | 2                 | Not specified                                   | Not specified                                  | Not specified                                                                            |
| [123]  | LCC                                                                   | Not specified                 | Not specified     | Secondary             | Not specified                | Not specified     | No                                              | No                                             | No                                                                                       |

| Source | Assessment method | Standards / Guidelines                      | Stakeholder(s)       | Data type     | Software      | No. of indicators | Discount rate                                               | Externalities? | Sensitivity analysis |
|--------|-------------------|---------------------------------------------|----------------------|---------------|---------------|-------------------|-------------------------------------------------------------|----------------|----------------------|
| [127]  | LCC               | Not specified                               | Road agency          | Secondary     | Not specified | 1                 | 4% (most likely value), 3% (min. value) and 7% (max. value) | No             | No                   |
| [126]  | LCC               | UNEP/SETAC guideline (2012)<br>Swarr (2011) | Road agency<br>Users | Secondary     | Not specified | 1                 | 5.50%                                                       | No             | No                   |
| [125]  | LCC               | Not specified                               | Road agency<br>Users | Not specified | RealCost 2.5  | Not specified     | Does not apply                                              | No             | No                   |

Table S3. Characteristics of the social assessments carried out in the reviewed studies

| Source | Assessment method          | Standards / Guidelines                                                                                         | Stakeholder(s)                                                   | Data type             | Software       | No. of sub-categories                                                | No. of indicators |
|--------|----------------------------|----------------------------------------------------------------------------------------------------------------|------------------------------------------------------------------|-----------------------|----------------|----------------------------------------------------------------------|-------------------|
| [103]  | Selected social indicators | Not specified                                                                                                  | Does not apply*                                                  | Not specified         | Not specified  | Does not apply                                                       | 0*                |
| [104]  | S-LCA                      | S-LCA guidelines, PSIA Handbook                                                                                | Consumers<br>Local community<br>Society<br>Value Chain<br>Actors | Primary and secondary | Not specified  | User: 7<br>Local community: 6<br>Society: 2<br>Value chain actors: 2 | 5**               |
| [105]  | Selected social indicators | Not specified                                                                                                  | Workers<br>Local community                                       | Not specified         | Not specified  | Does not apply                                                       | 6                 |
| [106]  | Selected social indicators | Not specified                                                                                                  | Local community                                                  | Not specified         | Not specified  | Does not apply                                                       | 1                 |
| [113]  | Selected social indicators | Not specified                                                                                                  | Workers                                                          | Primary and secondary | Not specified  | Does not apply                                                       | 1                 |
| [114]  | S-LCA                      | S-LCA Guidelines                                                                                               | Local community                                                  | Not specified         | Not specified  | 1                                                                    | 1                 |
| [115]  | Selected social indicators | International Road Assessment Programme methodology                                                            | Consumers                                                        | Primary and secondary | iRAP           | Does not apply                                                       | 1                 |
| [119]  | S-LCA                      | Not specified                                                                                                  | Not specified                                                    | Secondary             | SimaPro        | Not specified                                                        | 5**               |
| [120]  | Selected social indicators | Not specified                                                                                                  | Consumers<br>Local community                                     | Not specified         | Does not apply | Does not apply                                                       | 6                 |
| [121]  | Selected social indicators | Directive 2008/96/EC on road infrastructure safety management<br>CNOSSOS-EU method for strategic noise mapping | Consumers<br>Local community                                     | Secondary             | Not specified  | Does not apply                                                       | 4                 |
| [122]  | Selected social indicators | Not specified                                                                                                  | Consumers<br>Local community                                     | Secondary             | Not specified  | Does not apply                                                       | 2                 |
| [123]  | Selected social indicators | Not specified                                                                                                  | Consumers<br>Local community<br>Workers                          | Secondary             | Not specified  | Does not apply                                                       | 2                 |
| [127]  | S-LCA                      | Not specified                                                                                                  | Worker<br>Local community<br>Society<br>Consumer                 | Not specified         | Not specified  | Worker: 3<br>Local community: 2<br>Society: 2                        | 9                 |

| Source | Assessment method | Standards / Guidelines        | Stakeholder(s)                                   | Data type             | Software      | No. of sub-categories                                        | No. of indicators |
|--------|-------------------|-------------------------------|--------------------------------------------------|-----------------------|---------------|--------------------------------------------------------------|-------------------|
| [126]  | S-LCA             | UNEP/SETAC guideline (2012)   | Worker<br>Local community<br>Society<br>Consumer | Primary and secondary | Not specified | Worker: 3<br>Local community: 2<br>Society: 2<br>Consumer: 1 | 10                |
| [125]  | S-LCA             | ISO 14040<br>S-LCA Guidelines | 3 stakeholders, but not specified                | Primary and secondary | Not specified | 12                                                           | 16                |



Table S4. Integration approaches and result interpretation of the three sustainability dimensions in the reviewed studies

| Source | Combined interpretation of results? | Interpretation method                                                                                                                         | Weighting approach                                                                               | Weight distribution                                                                                                                                  | Visualization approach of combined results                                                                                                                                     |
|--------|-------------------------------------|-----------------------------------------------------------------------------------------------------------------------------------------------|--------------------------------------------------------------------------------------------------|------------------------------------------------------------------------------------------------------------------------------------------------------|--------------------------------------------------------------------------------------------------------------------------------------------------------------------------------|
| [103]  | Yes                                 | Index – Road Sustainability Index (RSI)                                                                                                       | Examination of selected rating systems for road projects                                         | Two sets of weighting:<br>(1) Environment 50%, economy 25%, society 25%<br>(2) Environment 34%, economy 33%, society 33%                             | Bar chart with the values for each dimension presented in a single bar for all assessed alternatives                                                                           |
| [104]  | Yes                                 | Index                                                                                                                                         | AHP for individual indicators and for sustainability dimensions                                  | Environment: 29.50%<br>Economic: 27.68%<br>Social: 42.82%                                                                                            | No visualization                                                                                                                                                               |
| [105]  | Not specified                       | DPSIR (Driver, Pressure, State, Impact, Response) framework within a performance management framework                                         | No weighting                                                                                     | No weighting                                                                                                                                         | No visualization                                                                                                                                                               |
| [106]  | Yes                                 | Monetarization of results through application of CBA                                                                                          | No weighting                                                                                     | No weighting                                                                                                                                         | Bar chart showing monetarized impacts and life cycle costs                                                                                                                     |
| [113]  | Yes                                 | Trade-offs – Focus of savings achieved through analyzed alternative for all dimensions and possible trade-offs                                | No weighting                                                                                     | No weighting                                                                                                                                         | Pie charts with total indicators for each variant. Disaggregation based on road structure (surface, binder and base layers), but no disaggregation based on life cycle stages. |
| [114]  | Yes                                 | Ranking of alternatives based on weights assigned by decision-makers                                                                          | Traditional and modified AHP for the individual indicators and for the sustainability dimensions | Traditional AHP:<br>- Environment: 8%<br>- Economic: 54%<br>- Social: 38%<br>Modified AHP:<br>- Environment: 10%<br>- Economic: 45%<br>- Social: 45% | Radar chart with ranking of the different alternatives done by decision-makers                                                                                                 |
| [115]  | Yes                                 | Trade-offs – Focus of trade-offs between sustainability dimensions. Aggregation of results into an index was recommended, but not carried out | No weighting                                                                                     | No weighting                                                                                                                                         | No visualization                                                                                                                                                               |
| [116]  | Yes                                 | MCDM – Technique for Order of Preference by Similarity to Ideal                                                                               | Fuzzy entropy based on the opinion of the decision makers                                        | Weights are given for life cycle stages and indicators in vector form                                                                                | No visualization                                                                                                                                                               |

| Source | Combined interpretation of results? | Interpretation method                                                                                                                                                                      | Weighting approach                                                                                                                                                                                                                                                                                  | Weight distribution                                                                                                   | Visualization approach of combined results                                                                    |
|--------|-------------------------------------|--------------------------------------------------------------------------------------------------------------------------------------------------------------------------------------------|-----------------------------------------------------------------------------------------------------------------------------------------------------------------------------------------------------------------------------------------------------------------------------------------------------|-----------------------------------------------------------------------------------------------------------------------|---------------------------------------------------------------------------------------------------------------|
|        |                                     | Solution (TOPSIS) method, intuitionistic fuzzy entropy method, intuitionistic fuzzy weighted geometric averaging operator, and intuitionistic fuzzy-weighted arithmetic averaging operator |                                                                                                                                                                                                                                                                                                     |                                                                                                                       |                                                                                                               |
| [117]  | Yes                                 | MCDM - Compromise Programming                                                                                                                                                              | Weights of the environmental dimension: Building for Economic and Environmental Sustainability (BEES) software, v.4.0<br>- Aggregation of environmental KPI to category score: Weights of the BEES framework<br>- Weights of sustainability dimensions based on the priorities of local governments | Several weighting sets are provided. The economic and social dimensions are aggregated into a 'socio-economic weight' | Bar chart showing the most appropriate allocation of pavement alternatives based on different sets of weights |
| [119]  | Yes                                 | Index – Green Road Score                                                                                                                                                                   |                                                                                                                                                                                                                                                                                                     | Environment: 40%<br>Economic: 50%<br>Social: 10%                                                                      | No visualization                                                                                              |
| [120]  | No                                  | Separate analysis of the results for each sustainability dimension                                                                                                                         | No weighting                                                                                                                                                                                                                                                                                        | No weighting                                                                                                          | No visualization                                                                                              |
| [121]  | Yes                                 | MCDM – PROMETHEE-II method                                                                                                                                                                 | Subjective (based on preference of the consulted decision-makers) and Objective (used for the sensitivity analysis, based on the Entropy and mean weight methods)                                                                                                                                   | Environment: 69.47%<br>Economic: 9.78%<br>Social: 20.76%                                                              | No visualization                                                                                              |
| [122]  | Yes                                 | Index – Socio-Eco-Efficiency                                                                                                                                                               | Data Envelopment Analysis (DEA)                                                                                                                                                                                                                                                                     | Not specified                                                                                                         | Bar chart showing the calculated index                                                                        |
| [123]  | Yes                                 | Trade-offs – Consideration of the influence of selected parameters in the defined sustainability indicators                                                                                | No weighting                                                                                                                                                                                                                                                                                        | No weighting                                                                                                          | Bar chart of relative difference in the outcome compared to a baseline scenario                               |

| Source | Combined interpretation of results? | Interpretation method                                                                      | Weighting approach | Weight distribution                                    | Visualization approach of combined results                                             |
|--------|-------------------------------------|--------------------------------------------------------------------------------------------|--------------------|--------------------------------------------------------|----------------------------------------------------------------------------------------|
| [127]  | Yes                                 | Index – Improved AHP-ISD (Integrated Sustainability Degree) (probabilistic)                | AHP                | Environment: 25,6%<br>Economic: 43.0%<br>Social: 31.3% | Bar chart showing the probabilistic distribution of ISDs for the pavement alternatives |
| [126]  | Yes                                 | MCDM – Combination of VIKOR (VišeKriterijumska Optimizacija I Kompromisno Resenje) and AHP | AHP                | Environment: 25.6%<br>Economic: 43.0%<br>Social: 31.3% | No visualization                                                                       |
| [125]  | Yes                                 | MCDM – TOPSIS                                                                              | AHP                | Not specified                                          | No visualization                                                                       |

Table S5. Characteristics of the sustainability rating systems proposed or presented in the reviewed studies

| Source | Criteria structure                                                                                                                                      | Categories (weighting)                                                                                                                                                                                           | Evaluation                                                                                                                                                                                                                                                                                                                                                                                                                                                                                                                                        |
|--------|---------------------------------------------------------------------------------------------------------------------------------------------------------|------------------------------------------------------------------------------------------------------------------------------------------------------------------------------------------------------------------|---------------------------------------------------------------------------------------------------------------------------------------------------------------------------------------------------------------------------------------------------------------------------------------------------------------------------------------------------------------------------------------------------------------------------------------------------------------------------------------------------------------------------------------------------|
| [102]  | Indicator → Sub-category → Category                                                                                                                     | Environmental impacts (20%)<br>Mobility for all (20%)<br>Transportation planning (19%)<br>Materials and resources (19%)<br>Leadership (22%)                                                                      | Each indicator gets a score, which are added and weighted to determine the score of the sub-category. The weighted addition of the score of the sub-categories comprise the score of the category. The addition of the category-level results comprises the result of the assessment.<br>Four performance levels are considered: Level A (≥ 80%), level B (≥ 70 and ≤ 79%), level C (≥ 60 and ≤ 69%) and level D (≥ 50 and ≤ 59%).                                                                                                                |
| [69]   | Evaluation standards and criteria                                                                                                                       | Environmental quality<br>Economic quality<br>Socio-cultural quality<br>Technical quality<br>Process quality                                                                                                      | Partial results are obtained for each indicator in their respective category. The addition of the results at category level comprise the final result, which can lead to a certification.<br>The performance levels are not specified.                                                                                                                                                                                                                                                                                                            |
| [107]  | Indicators → Theme                                                                                                                                      | Planning (11%)<br>Participation (10%)<br>Mobility/Safety (14%)<br>Environmental impact (20%)<br>Access and equity (12%)<br>Natural resources (12%)<br>Financial competency (10%)<br>Innovation and quality (11%) | Indicators are evaluated using a 100-point scale. The final result is a weighted aggregation of the score and is expressed in a scale of 100 points.                                                                                                                                                                                                                                                                                                                                                                                              |
| [108]  | Micro-indicators (units) → Macro-indicators → Sustainability dimensions                                                                                 | Environment (35.02%)<br>Society (31.00%)<br>Economy (33.98%)                                                                                                                                                     | The results of all indicators are aggregated, and based on this, one or several sustainability indexes are developed.                                                                                                                                                                                                                                                                                                                                                                                                                             |
| [109]  | Not specified                                                                                                                                           | Environmental criteria<br>Economic criteria<br>Social criteria<br>Technical criteria                                                                                                                             | Two levels of achievement: light (basic, covering a minimum range of criteria) and complete (covering the whole range of requirements)                                                                                                                                                                                                                                                                                                                                                                                                            |
| [110]  | Performance measures → Indicators → Objectives → Goals → Sustainability dimensions (environment, social, economic, financial, technological, corporate) | Environment<br>Social<br>Economic<br>Financial<br>Technological<br>Corporate                                                                                                                                     | An index is calculated for each sustainability dimension. Each sustainability dimension has a different weight. The end result can be calculated using an outcome-based approach - an indicator is calculated - or a process-based approach - the qualitative performance of the agency is assessed.<br>The results are connected to weighted objectives, corresponding to weighted goals. The goals form the sustainability indices. With their respective weighting, the sustainability indices comprise the Sustainable Composite Index (SCI). |

| Source | Criteria structure                                     | Categories (weighting)                                                                                                                                              | Evaluation                                                                                                                                                                                                                                                                                                                                                                                                                                                  |
|--------|--------------------------------------------------------|---------------------------------------------------------------------------------------------------------------------------------------------------------------------|-------------------------------------------------------------------------------------------------------------------------------------------------------------------------------------------------------------------------------------------------------------------------------------------------------------------------------------------------------------------------------------------------------------------------------------------------------------|
| [111]  | Sustainability indicators → Sustainability aspects     | Social<br>Economic<br>Environmental                                                                                                                                 | Not specified - the case study was only used to form a committee to assign the ranking to the different indicators                                                                                                                                                                                                                                                                                                                                          |
| [112]  | Standardized questions → Principles → Themes           | Ecology / Planet<br>Social / People<br>Economy / Profit                                                                                                             | Each theme is assessed by answering a set of standardized questions. With the answer to the questions, a sustainability score can be calculated and visualized in a 'synergy wheel'.                                                                                                                                                                                                                                                                        |
| [118]  | Project requirements or Voluntary Credits → Categories | Project requirements<br>Environment and water<br>Access and equity<br>Construction activities<br>Materials and resources<br>Pavement technologies<br>Custom credits | Compliance with a series of project requirements (mandatory, no points awarded), voluntary credits (a maximum of 108 points can be awarded) and custom credits (10 credits can be awarded).<br>There are four achievement levels: Certified (30–40% of the total Voluntary Credit points), Silver (40–50% of the total Voluntary Credit points), Gold (50–60% of the total Voluntary Credit points), Evergreen (>60% of the total Voluntary Credit points). |
| [124]  | Secondary indicators → First grade indicators          | Quality:<br>- Society and economy (60%)<br>- Service (40%)<br>Load:<br>- Resource: (40%)<br>- Environment (60%)                                                     | Questionnaires and AHP are used to assign weights to the indicators. Based on this, a Sustainable Development Index (SDI) is calculated. The SDI is the ratio of the Quality indicators (society and economy, service) divided by the Load indicators (resource, environment)                                                                                                                                                                               |

Table S6. SRS indicators

| Source                                 | Indicator                                                                     | Category (as in SRS)  | Indicator type    | Comment       |
|----------------------------------------|-------------------------------------------------------------------------------|-----------------------|-------------------|---------------|
| <b>ENVIRONMENT</b>                     |                                                                               |                       |                   |               |
| <b>Biodiversity</b>                    |                                                                               |                       |                   |               |
| [112]                                  | Biodiversity                                                                  | Ecology / planet      | Semi-quantitative |               |
| [108]                                  | Biodiversity protection                                                       | Environment           | Qualitative       | Best practice |
| [118]                                  | Connect habitat across roadways                                               | Environment & Water   | Qualitative       | Best practice |
| [108]                                  | Barrier effect                                                                | Environment           | Semi-quantitative | Best practice |
| [102]                                  | Provide right-of-way wildlife barriers                                        | Environmental impacts | Qualitative       | Best practice |
| [118]                                  | Create new habitat beyond what is required                                    | Environment & Water   | Qualitative       | Best practice |
| [102]                                  | Increase tree species through preservation and new planting                   | Environmental impacts | Semi-quantitative | Best practice |
| [112]                                  | Ecological structures                                                         | Ecology / planet      | Semi-quantitative |               |
| [111]                                  | Habitat loss and damage                                                       | Environmental         | Semi-quantitative |               |
| [124]                                  | Ecological investigation                                                      | Environment           | Qualitative       |               |
| [107]                                  | Preserve habitat and ecological                                               | Environmental impact  | Qualitative       | Best practice |
| [102]                                  | Protect, Enhance or restore wildlife habitat                                  | Environmental impacts | Semi-quantitative | Best practice |
| [112]                                  | Room for flora and fauna                                                      | Ecology / planet      | Qualitative       |               |
| [118]                                  | Use native low/no water vegetation                                            | Environment & Water   | Qualitative       | Best practice |
| <b>Climate mitigation and adaption</b> |                                                                               |                       |                   |               |
| [109]                                  | % of budget associated to climate resilience mitigation and adaption measures | Technical criteria    | Quantitative      |               |
| [108]                                  | Adaptation and vulnerability to climate and environmental change              | Economy               | Qualitative       | Best practice |
| [112]                                  | Climate proofing                                                              | Ecology / planet      | Qualitative       | Best practice |
| [102]                                  | Natural hazard risk and adaptation                                            | Environmental impacts | Semi-quantitative | Best practice |
| [102]                                  | Risk assessment and mitigation                                                | Leadership            | Semi-quantitative | Best practice |
| <b>Environmental impacts</b>           |                                                                               |                       |                   |               |
| [111]                                  | Air Pollution                                                                 | Environmental         | Quantitative      |               |
| [102]                                  | Air Quality and Emissions                                                     | Environmental impacts | Quantitative      |               |
| [107]                                  | Dust control during construction                                              | Environmental impact  | Qualitative       | Best practice |

| Source                                 | Indicator                                                                   | Category (as in SRS)    | Indicator type    | Comment       |
|----------------------------------------|-----------------------------------------------------------------------------|-------------------------|-------------------|---------------|
| [118]                                  | Reduce air emissions systematically                                         | Access & Quality        | Quantitative      | Best practice |
| [107]                                  | Use low emission equipment                                                  | Environmental impact    | Qualitative       | Best practice |
| [107]                                  | Use low emission material                                                   | Environmental impact    | Qualitative       | Best practice |
| [108]                                  | CO <sub>2</sub> emissions                                                   | Environment             | Quantitative      |               |
| [107]                                  | Competent material selection by LCA                                         | Natural resources       | Quantitative      |               |
| [118]                                  | Conduct a detailed LCA of the entire project                                | Materials & Resources   | Quantitative      |               |
| [109]                                  | Environmental impacts of infrastructure (Following EN 15804)                | Environmental criteria  | Quantitative      |               |
| [102]                                  | Environmentally labelled products and supply chains                         | Materials and resources | Qualitative       | Best practice |
| [108]                                  | Ecological footprint                                                        | Environment             | Quantitative      |               |
| [107]                                  | Reduced construction footprint                                              | Natural resources       | Quantitative      |               |
| [111]                                  | Ecological impacts                                                          | Environmental           | Quantitative      |               |
| [118]                                  | Paving emission reduction - Use pavers that meet NIOSH requirements         | Construction activities | Semi-quantitative | Best practice |
| [118]                                  | Equipment Emission Reduction - Meet EPA Tier 4 standards for non-road equip | Construction activities | Semi-quantitative | Best practice |
| [111]                                  | Erosion                                                                     | Environmental           | Quantitative      |               |
| [107]                                  | Low impact snow removal material / process                                  | Environmental impact    | Qualitative       | Best practice |
| [107]                                  | Minimize disturbance in water bodies                                        | Environmental impact    | Qualitative       | Best practice |
| [107]                                  | Pre-construction hydrological condition                                     | Environmental impact    | Quantitative      |               |
| [111]                                  | Water Pollution                                                             | Environmental           | Quantitative      |               |
| <b>Land use</b>                        |                                                                             |                         |                   |               |
| [107]                                  | Buffer between water body and road edge                                     | Environmental impact    | Semi-quantitative | Best practice |
| [112]                                  | Expansion (use of space)                                                    | Social / people         | Qualitative       |               |
| [112]                                  | Multiple land use                                                           | Social / people         | Semi-quantitative |               |
| [112]                                  | Restructuring (use of space)                                                | Social / people         | Qualitative       |               |
| [112]                                  | Spatial quality values: experience, use and future                          | Social / people         | Qualitative       |               |
| <b>Resource and energy consumption</b> |                                                                             |                         |                   |               |
| [112]                                  | Consequences of extraction of resources                                     | Ecology / planet        | Semi-quantitative |               |
| [124]                                  | Environmentally friendly materials                                          | Resource                | Semi-quantitative | Best practice |
| [102]                                  | Energy and Fuels                                                            | Environmental impacts   | Quantitative      |               |

| Source | Indicator                                                                                           | Category (as in SRS)    | Indicator type    | Comment       |
|--------|-----------------------------------------------------------------------------------------------------|-------------------------|-------------------|---------------|
| [108]  | Energy consumption                                                                                  | Economy                 | Quantitative      |               |
| [112]  | Exchange of energy                                                                                  | Ecology / planet        | Qualitative       |               |
| [118]  | Improve energy efficiency of operational systems                                                    | Materials & Resources   | Quantitative      | Best practice |
| [112]  | Reduction of energy consumption                                                                     | Ecology / planet        | Quantitative      |               |
| [112]  | Robustness of energy networks                                                                       | Ecology / planet        | Semi-quantitative |               |
| [108]  | Use of renewable energies                                                                           | Economy                 | Quantitative      |               |
| [112]  | Use of renewable energy                                                                             | Ecology / planet        | Quantitative      |               |
| [102]  | Use of renewable Energy                                                                             | Environmental impacts   | Quantitative      |               |
| [118]  | Use of alternative fuels in construction equipment                                                  | Construction activities | Qualitative       | Best practice |
| [112]  | Use of fossil fuels                                                                                 | Ecology / planet        | Quantitative      |               |
| [124]  | Land resources                                                                                      | Resource                | Qualitative       |               |
| [112]  | Linkage with existing regional or other construction needs                                          | Social / people         | Qualitative       |               |
| [108]  | Material consumption                                                                                | Environment             | Quantitative      |               |
| [111]  | Material consumption                                                                                | Environmental           | Quantitative      |               |
| [109]  | Materials to be used                                                                                | Environmental criteria  | Semi-quantitative |               |
| [118]  | Perform LCI of pavement section with software tool                                                  | Project requirements    | Quantitative      |               |
| [102]  | Use local Materials                                                                                 | Materials and resources | Semi-quantitative |               |
| [108]  | Use of regional materials                                                                           | Society                 | Quantitative      |               |
| [118]  | Use of regional materials to reduce emissions                                                       | Materials & Resources   | Qualitative       | Best practice |
| [124]  | Material saving                                                                                     | Resource                | Qualitative       | Best practice |
| [124]  | Resource recovery                                                                                   | Resource                | Quantitative      | Best practice |
| [118]  | Reuse existing pavement sections                                                                    | Materials & Resources   | Qualitative       |               |
| [107]  | Reused material                                                                                     | Natural resources       | Qualitative       | Best practice |
| [118]  | Use of recycled materials for new pavement                                                          | Materials & Resources   | Qualitative       | Best practice |
| [102]  | Use of recycled asphalt pavement (RAP) in the construction instead of new hot mix asphalt pavements | Materials and resources | Quantitative      |               |
| [124]  | Sustainable wood                                                                                    | Resource                | Quantitative      | Best practice |
| [118]  | Use a surface that retains less heat                                                                | Pavement technologies   | Qualitative       | Best practice |
| [118]  | Use permeable pavement as a Low-Impact Development technique                                        | Pavement technologies   | Qualitative       | Best practice |



| Source                              | Indicator                                        | Category (as in SRS)    | Indicator type    | Comment       |
|-------------------------------------|--------------------------------------------------|-------------------------|-------------------|---------------|
| [118]                               | Use warm mix asphalt in place of hot mix asphalt | Pavement technologies   | Qualitative       | Best practice |
| [118]                               | Develop data on water use in construction        | Construction activities | Semi-quantitative | Best practice |
| [107]                               | Water efficient                                  | Environmental impact    | Qualitative       | Best practice |
| [112]                               | Water quality                                    | Ecology / planet        | Quantitative      |               |
| [108]                               | Water resource protection                        | Environment             | Qualitative       | Best practice |
| [112]                               | Water safety                                     | Ecology / planet        | Quantitative      |               |
| [108]                               | Reduced water use                                | Natural resources       | Quantitative      |               |
| [111]                               | Water saving                                     | Environmental           | Quantitative      |               |
| [112]                               | Water shortage                                   | Ecology / planet        | Quantitative      |               |
| <b>Waste</b>                        |                                                  |                         |                   |               |
| [107]                               | Construction waste management plan               | Environmental impact    | Qualitative       | Best practice |
| [118]                               | Have a plan to divert C&D waste from landfill    | Project requirements    | Qualitative       | Best practice |
| [111]                               | Hazardous waste                                  | Environmental           | Quantitative      |               |
| [118]                               | Provide plan for on-site recycling and trash     | Construction activities | Qualitative       | Best practice |
| [107]                               | Recycled material                                | Natural resources       | Qualitative       | Best practice |
| [108]                               | Waste management                                 | Environment             | Quantitative      |               |
| <b>SOCIETY</b>                      |                                                  |                         |                   |               |
| <b>Accessibility to structure</b>   |                                                  |                         |                   |               |
| [102]                               | Access and Affordability                         | Transportation planning | Qualitative       | Best practice |
| [112]                               | Accessibility and connectivity                   | Economy/Profit          | Qualitative       | Best practice |
| [108]                               | Accessibility                                    | Society                 | Qualitative       | Best practice |
| [107]                               | Facility to disabled and aging people            | Access and equity       | Qualitative       | Best practice |
| [118]                               | Provide/improve pedestrian accessibility         | Access & Quality        | Qualitative       | Best practice |
| [107]                               | Access management plan                           | Planning                | Qualitative       | Best practice |
| <b>Accessibility to information</b> |                                                  |                         |                   |               |
| [107]                               | Access to information                            | Access and equity       | Qualitative       | Best practice |
| [118]                               | Publicize sustainability information for project | Project requirements    | Qualitative       | Best practice |
| [102]                               | Effective communication                          | Leadership              | Qualitative       | Best practice |

| Source                            | Indicator                                                                                                | Category (as in SRS)    | Indicator type    | Comment       |
|-----------------------------------|----------------------------------------------------------------------------------------------------------|-------------------------|-------------------|---------------|
| [102]                             | Knowledge sharing                                                                                        | Leadership              | Qualitative       | Best practice |
| <b>Adaptability</b>               |                                                                                                          |                         |                   |               |
| [112]                             | Adaptiveness for mobility policies                                                                       | Economy/Profit          | Qualitative       | Best practice |
| [108]                             | Functionality and flexibility                                                                            | Society                 | Qualitative       | Best practice |
| <b>Comfort and user amenities</b> |                                                                                                          |                         |                   |               |
| [107]                             | Bicycle path and dedicated access                                                                        | Access and equity       | Qualitative       | Best practice |
| [102]                             | Install bikeway signs                                                                                    | Transportation planning | Qualitative       | Best practice |
| [102]                             | Provide bike spaces at Park-and-Ride places and transit stations                                         | Transportation planning | Qualitative       | Best practice |
| [102]                             | Restore or pave shoulders for bicycling                                                                  | Transportation planning | Qualitative       | Best practice |
| [112]                             | Available services for citizens                                                                          | Economy/Profit          | Qualitative       |               |
| [109]                             | Comfort                                                                                                  | Social criteria         | Semi-quantitative |               |
| [118]                             | Have a construction noise mitigation plan                                                                | Project requirements    | Qualitative       | Best practice |
| [102]                             | Improved shading through vegetation at Park-and-Ride places                                              | Transportation planning | Qualitative       | Best practice |
| [107]                             | Pedestrian path and dedicated access                                                                     | Access and equity       | Qualitative       | Best practice |
| [102]                             | Pedestrian paths and sidewalks                                                                           | Mobility for all        | Qualitative       | Best practice |
| [112]                             | Positive contribution and limitation risks (wellbeing)                                                   | Social / people         | Semi-quantitative |               |
| [108]                             | Visual impact                                                                                            | Society                 | Qualitative       |               |
| [111]                             | Aesthetical and visual impacts                                                                           | Environmental           | Qualitative       |               |
| [118]                             | Provide views of scenery or vistas                                                                       | Access & Quality        | Qualitative       | Best practice |
| [102]                             | Installation of coordinated signal system                                                                | Transportation planning | Qualitative       | Best practice |
| [102]                             | Responsive Traffic Signals                                                                               | Transportation planning | Qualitative       | Best practice |
| [102]                             | Retrofit existing street lighting, existing sign and traffic signals lighting with high efficiency types | Materials and resources | Qualitative       | Best practice |
| [102]                             | Sidewalks lighting and design                                                                            | Mobility for all        | Qualitative       | Best practice |
| <b>Cultural heritage</b>          |                                                                                                          |                         |                   |               |
| [112]                             | Archaeology                                                                                              | Ecology / planet        | Qualitative       |               |
| [102]                             | Accessibility for Archaeology and Historical places that exists along the road                           | Environmental impacts   | Qualitative       | Best practice |
| [102]                             | Accessibility for Culture and Recreation places                                                          | Mobility for all        | Qualitative       | Best practice |
| [124]                             | Cultural heritage                                                                                        | Environment             | Qualitative       |               |

| Source                   | Indicator                                                                            | Category (as in SRS)    | Indicator type    | Comment       |
|--------------------------|--------------------------------------------------------------------------------------|-------------------------|-------------------|---------------|
| [118]                    | Promote art/culture/community values on roadway                                      | Access & Quality        | Qualitative       | Best practice |
| [118]                    | Respect for local customs                                                            | Society                 | Qualitative       | Best practice |
| [111]                    | Measure of negative impacts from construction operations on any cultural heritage    | Social                  | Semi-quantitative |               |
| <b>Education</b>         |                                                                                      |                         |                   |               |
| [111]                    | Supply rate of training course to employees to provide a safe and reliable workplace | Social                  | Quantitative      |               |
| [111]                    | Time of training course to different levels of employees                             | Social                  | Quantitative      |               |
| [111]                    | Number of training course to different levels of employees                           | Social                  | Quantitative      |               |
| [118]                    | Provide environmental training                                                       | Construction activities | Qualitative       | Best practice |
| <b>Employment</b>        |                                                                                      |                         |                   |               |
| [112]                    | Accessibility of job market for citizens                                             | Economy/Profit          | Semi-quantitative |               |
| [112]                    | Employment opportunities for citizens                                                | Economy/Profit          | Semi-quantitative |               |
| [112]                    | Local expertise                                                                      | Social / people         | Semi-quantitative |               |
| [112]                    | Development of labour force                                                          | Economy/Profit          | Semi-quantitative |               |
| [111]                    | Provision of direct and indirect jobs                                                | Social                  | Quantitative      |               |
| [107]                    | Access for all to work                                                               | Access and equity       | Qualitative       | Best practice |
| <b>Health and safety</b> |                                                                                      |                         |                   |               |
| [111]                    | Health                                                                               | Social                  | Quantitative      |               |
| [108]                    | Health and safety                                                                    | Society                 | Semi-quantitative |               |
| [102]                    | Inclusion of transit vehicle priority                                                | Transportation planning | Qualitative       | Best practice |
| [111]                    | Number of accidents                                                                  | Social                  | Quantitative      |               |
| [107]                    | Optimized conflict points at intersection                                            | Mobility / Safety       | Qualitative       | Best practice |
| [107]                    | Optimized signal control                                                             | Mobility / Safety       | Qualitative       | Best practice |
| [118]                    | Perform roadway safety audit                                                         | Access & Quality        | Qualitative       | Best practice |
| [112]                    | Physical and social safety                                                           | Social / people         | Semi-quantitative |               |
| [109]                    | Safety (EU harmonized safety audit and safety inspection, Directive 2008/96EC)       | Social criteria         | Quantitative      |               |
| [107]                    | Safety audit and installation of safety                                              | Mobility / Safety       | Qualitative       | Best practice |
| [102]                    | Safety Management                                                                    | Leadership              | Qualitative       | Best practice |
| [107]                    | Safety measures for construction workers                                             | Mobility / Safety       | Qualitative       | Best practice |

| Source                            | Indicator                                                                   | Category (as in SRS)    | Indicator type    | Comment       |
|-----------------------------------|-----------------------------------------------------------------------------|-------------------------|-------------------|---------------|
| [111]                             | Supply rate of on-site supervision to provide a safe and reliable workplace | Social                  | Quantitative      |               |
| <b>Impacts on local community</b> |                                                                             |                         |                   |               |
| [112]                             | Demographical composition and trends                                        | Social / people         | Quantitative      |               |
| [111]                             | Impacts on Tourism development                                              | Social                  | Semi-quantitative |               |
| [102]                             | Light Pollution Reduction                                                   | Environmental impacts   | Semi-quantitative | Best practice |
| [118]                             | Discourage light pollution                                                  | Environment & Water     | Qualitative       | Best practice |
| [107]                             | Low vibrating equipment                                                     | Environmental impact    | Qualitative       | Best practice |
| [107]                             | Mitigate light pollution                                                    | Environmental impact    | Semi-quantitative | Best practice |
| [107]                             | Mobility at construction zone                                               | Mobility / Safety       | Qualitative       | Best practice |
| [109]                             | Noise                                                                       | Social criteria         | Quantitative      |               |
| [107]                             | Noise control measures                                                      | Environmental impact    | Qualitative       | Best practice |
| [111]                             | Noise Emissions                                                             | Environmental           | Quantitative      |               |
| [108]                             | Noise pollution                                                             | Environment             | Semi-quantitative |               |
| [112]                             | Prevention of nuisance                                                      | Social / people         | Qualitative       | Best practice |
| [102]                             | Replace signs with retro reflective signs to reduce sign Lighting           | Materials and resources | Qualitative       | Best practice |
| [118]                             | Use a quiet pavement to reduce noise                                        | Pavement technologies   | Qualitative       | Best practice |
| <b>Impacts on society</b>         |                                                                             |                         |                   |               |
| [124]                             | Promotion of political stability                                            | Society and economy     | Qualitative       | Best practice |
| [124]                             | Promotion of regional economy                                               | Society and economy     | Qualitative       | Best practice |
| [124]                             | Promotion of society                                                        | Society and economy     | Qualitative       | Best practice |
| [108]                             | Social need and urgency of the project                                      | Society                 | Qualitative       |               |
| [112]                             | Social wellbeing                                                            | Social / people         | Qualitative       |               |
| <b>Innovation</b>                 |                                                                             |                         |                   |               |
| [112]                             | Capacity for innovation and adaption                                        | Economy/Profit          | Qualitative       |               |
| [107]                             | Funding plan for research and development                                   | Financial competency    | Qualitative       | Best practice |
| [112]                             | Innovation strategies and technologies                                      | Leadership              | Qualitative       | Best practice |
| [108]                             | Innovative elements                                                         | Economy                 | Qualitative       | Best practice |
| [107]                             | Innovative ITS application                                                  | Innovation and quality  | Qualitative       | Best practice |

| Source                   | Indicator                                                                                                           | Category (as in SRS)   | Indicator type    | Comment       |
|--------------------------|---------------------------------------------------------------------------------------------------------------------|------------------------|-------------------|---------------|
| [107]                    | Innovative project delivery system                                                                                  | Innovation and quality | Qualitative       | Best practice |
| [107]                    | Innovative rapid construction technique                                                                             | Innovation and quality | Qualitative       | Best practice |
| [102]                    | Provide environmental or technological advancements through partnerships while advocating environmental stewardship | Leadership             | Qualitative       | Best practice |
| <b>Public engagement</b> |                                                                                                                     |                        |                   |               |
| [108]                    | General and social interest of the project                                                                          | Society                | Semi-quantitative |               |
| [107]                    | Involvement in design decision                                                                                      | Participation          | Qualitative       | Best practice |
| [107]                    | Involvement in financial planning                                                                                   | Participation          | Qualitative       | Best practice |
| [107]                    | Measure of Stakeholder satisfaction by using Stakeholder Management models                                          | Social                 | Quantitative      | Best practice |
| [107]                    | Participation in alignment selection                                                                                | Participation          | Qualitative       | Best practice |
| [107]                    | Public involvement in facility upkeep                                                                               | Participation          | Qualitative       | Best practice |
| [107]                    | Public involvement in need assessment                                                                               | Participation          | Qualitative       | Best practice |
| [107]                    | Public involvement in planning decision                                                                             | Participation          | Qualitative       | Best practice |
| [107]                    | Public outreach policy information                                                                                  | Participation          | Qualitative       | Best practice |
| [108]                    | Public participation                                                                                                | Society                | Qualitative       | Best practice |
| [112]                    | Public support                                                                                                      | Social / people        | Semi-quantitative |               |
| <b>ECONOMY</b>           |                                                                                                                     |                        |                   |               |
| <b>Costs</b>             |                                                                                                                     |                        |                   |               |
| [109]                    | Agency costs (according ISO 15656-5, including initial costs, maintenance costs and salvage value)                  | Economic criteria      | Quantitative      |               |
| [118]                    | Conduct an LCC for stormwater Best Management Practice / Low-Impact Development selection                           | Environment & Water    | Quantitative      | Best practice |
| [111]                    | LCC                                                                                                                 | Economic               | Quantitative      |               |
| [108]                    | LCC                                                                                                                 | Economy                | Quantitative      |               |
| [118]                    | Perform LCC for pavement section                                                                                    | Project requirements   | Quantitative      |               |
| [111]                    | Net Present value                                                                                                   | Economic               | Quantitative      |               |
| [111]                    | Cost-Benefit ratio                                                                                                  | Economic               | Quantitative      |               |
| [108]                    | Cost-Benefit ratio                                                                                                  | Economy                | Quantitative      |               |
| [112]                    | Cost-Benefit ratio                                                                                                  | Economy/Profit         | Quantitative      |               |

| Source                        | Indicator                                                | Category (as in SRS)  | Indicator type       | Comment       |
|-------------------------------|----------------------------------------------------------|-----------------------|----------------------|---------------|
| [111]                         | Debt-Asset ratio                                         | Economic              | Quantitative         |               |
| [111]                         | Payback period                                           | Economic              | Quantitative         |               |
| [107]                         | Cost effective material and process                      | Financial competency  | Qualitative          | Best practice |
| [108]                         | Costs incurred by users                                  | Economy               | Quantitative         |               |
| <b>Economic profit</b>        |                                                          |                       |                      |               |
| [112]                         | Area potential                                           | Economy/Profit        | Semi-quantitative    |               |
| [112]                         | Business climate                                         | Economy/Profit        | Semi-quantitative    |               |
| [108]                         | Increased economic value of the environment              | Economy               | Quantitative         |               |
| [111]                         | Internal rate of return                                  | Economic              | Quantitative         |               |
| [112]                         | Value capturing                                          | Economy/Profit        | Semi-quantitative    |               |
| <b>Finance</b>                |                                                          |                       |                      |               |
| [112]                         | Economic policy                                          | Economy/Profit        | Qualitative          |               |
| [111]                         | Financial risk                                           | Economic              | Quantitative         |               |
| [102]                         | Financial sustainability                                 | Leadership            | Cannot be classified |               |
| [111]                         | Investment planning; Compliance with the Investment plan | Economic              | Qualitative          |               |
| [107]                         | Sustainable capital investment                           | Financial competency  | Semi-quantitative    | Best practice |
| <b>OTHERS</b>                 |                                                          |                       |                      |               |
| <b>Design</b>                 |                                                          |                       |                      |               |
| [107]                         | Context sensitive and consistent design                  | Mobility / Safety     | Qualitative          | Best practice |
| [107]                         | Cost effective design alternative                        | Financial competency  | Qualitative          | Best practice |
| [107]                         | Cost effective alignment                                 | Financial competency  | Qualitative          | Best practice |
| [108]                         | Design for Dismantling (DfD)                             | Economy               | Qualitative          | Best practice |
| [118]                         | Design pavements for long-life                           | Pavement technologies | Qualitative          | Best practice |
| [102]                         | Improved intersection designs for pedestrians            | Mobility for all      | Qualitative          | Best practice |
| [124]                         | Integrate into network                                   | Function of transport | Qualitative          |               |
| [112]                         | Integrated design                                        | Social / people       | Qualitative          | Best practice |
| [107]                         | Integration with land use plan                           | Planning              | Qualitative          | Best practice |
| <b>Maintenance activities</b> |                                                          |                       |                      |               |

| Source            | Indicator                                                                             | Category (as in SRS)    | Indicator type    | Comment       |
|-------------------|---------------------------------------------------------------------------------------|-------------------------|-------------------|---------------|
| [107]             | Asset management / site maintenance plan                                              | Planning                | Qualitative       | Best practice |
| [107]             | Funding plan for maintenance                                                          | Financial competency    | Qualitative       | Best practice |
| [118]             | Have a site maintenance plan for environment, utilities                               | Project requirements    | Qualitative       | Best practice |
| [102]             | Maintenance Access                                                                    | Transportation planning | Qualitative       | Best practice |
| [102]             | Maintenance Management System                                                         | Leadership              | Qualitative       | Best practice |
| <b>Management</b> |                                                                                       |                         |                   |               |
| [107]             | Application of lean technique                                                         | Innovation and quality  | Qualitative       | Best practice |
| [118]             | Complete an environmental review process                                              | Project requirements    | Qualitative       | Best practice |
| [111]             | Compliance with project budget                                                        | Economic                | Qualitative       | Best practice |
| [107]             | Consistency with state / regional plans                                               | Planning                | Qualitative       | Best practice |
| [108]             | Disaster risk management (flooding, earthquakes)                                      | Society                 | Qualitative       | Best practice |
| [107]             | Environmental management plan                                                         | Planning                | Qualitative       | Best practice |
| [118]             | Environmental Management System - Have ISO 14001 certification for general contractor | Environment & Water     | Qualitative       | Best practice |
| [118]             | Environmental management                                                              | Environment             | Qualitative       | Best practice |
| [107]             | Funding pan for administrative expense                                                | Financial competency    | Qualitative       | Best practice |
| [118]             | Have a formal contractor quality control plan                                         | Project requirements    | Qualitative       | Best practice |
| [118]             | Have a pavement preservation system                                                   | Project requirements    | Qualitative       | Best practice |
| [118]             | Offer an extended warranty on pavement                                                | Construction activities | Semi-quantitative | Best practice |
| [124]             | Operation                                                                             | Function of transport   | Qualitative       |               |
| [102]             | Pavement Management System                                                            | Leadership              | Qualitative       | Best practice |
| [118]             | Pavement performance tracking - Relate construction to performance data               | Pavement technologies   | Qualitative       | Best practice |
| [118]             | Plan for context sensitive solutions                                                  | Access & Quality        | Qualitative       | Best practice |
| [108]             | Project and strategic Management                                                      | Economy                 | Qualitative       | Best practice |
| [107]             | Quality management plan implementation                                                | Innovation and quality  | Qualitative       | Best practice |
| [118]             | Quality Management System - Have ISO 9001 certification for general contractor        | Construction activities | Qualitative       | Best practice |
| [102]             | Sustainability leadership and commitment                                              | Leadership              | Qualitative       | Best practice |
| <b>Mobility</b>   |                                                                                       |                         |                   |               |
| [102]             | Comprehensive transportation plan                                                     | Transportation planning | Qualitative       | Best practice |

| Source                    | Indicator                                                                                                                 | Category (as in SRS)    | Indicator type    | Comment       |
|---------------------------|---------------------------------------------------------------------------------------------------------------------------|-------------------------|-------------------|---------------|
| [112]                     | Efficient infrastructure use                                                                                              | Economy/Profit          | Qualitative       | Best practice |
| [102]                     | Electric vehicle infrastructure                                                                                           | Materials and resources | Qualitative       | Best practice |
| [111]                     | Extension of public transportation services and proximity to it                                                           | Social                  | Semi-quantitative |               |
| [118]                     | Implement ITS solutions                                                                                                   | Access & Quality        | Qualitative       | Best practice |
| [102]                     | Improve Community Mobility and Access                                                                                     | Mobility for all        | Qualitative       | Best practice |
| [102]                     | Increased use of public transit to ensure reduction in vehicle trips                                                      | Transportation planning | Semi-quantitative | Best practice |
| [102]                     | Intelligent Transportation System (ITS) for System Operations                                                             | Transportation planning | Qualitative       | Best practice |
| [118]                     | Provide/improve transit/HOV accessibility                                                                                 | Access & Quality        | Qualitative       | Best practice |
| [112]                     | Robustness of transport system within/between modalities                                                                  | Economy/Profit          | Semi-quantitative |               |
| [102]                     | Separation of Modes (e.g., pedestrians and cyclists are physically separated from motorized transportation <sup>9</sup> ) | Mobility for all        | Qualitative       | Best practice |
| <b>Soil and earthwork</b> |                                                                                                                           |                         |                   |               |
| [102]                     | Allow the Use of soil stabilization with cementitious and recycled Materials                                              | Materials and resources | Quantitative      |               |
| [112]                     | Diversity of soil types                                                                                                   | Ecology / planet        | Quantitative      |               |
| [107]                     | Earthwork balance                                                                                                         | Natural resources       | Qualitative       | Best practice |
| [118]                     | Earthwork balance - Balance cut/fill quantities                                                                           | Materials & Resources   | Semi-quantitative | Best practice |
| [108]                     | Ecological value of soil                                                                                                  | Environment             | Semi-quantitative |               |
| [124]                     | Landform                                                                                                                  | Environment             | Qualitative       |               |
| [111]                     | Landscape respect                                                                                                         | Environmental           | Qualitative       |               |
| [112]                     | Soil biodiversity                                                                                                         | Ecology / planet        | Quantitative      |               |
| [111]                     | Soil contamination                                                                                                        | Environmental           | Quantitative      |               |
| [112]                     | Soil quality                                                                                                              | Ecology / planet        | Quantitative      |               |
| [112]                     | Soil subsidence                                                                                                           | Ecology / planet        | Quantitative      |               |
| [107]                     | Context sensitive landscape                                                                                               | Environmental impact    | Qualitative       | Best practice |
| [102]                     | Water efficient Landscaping                                                                                               | Environmental impacts   | Qualitative       | Best practice |
| <b>Stormwater</b>         |                                                                                                                           |                         |                   |               |
| [118]                     | Have a stormwater pollution prevention plan                                                                               | Project requirements    | Qualitative       | Best practice |
| [118]                     | Study feasibility of Low-Impact Development techniques for stormwater                                                     | Project requirements    | Qualitative       | Best practice |
| [118]                     | Treat stormwater on-site                                                                                                  | Environment & Water     | Quantitative      | Best practice |



| Source         | Indicator                                               | Category (as in SRS)    | Indicator type    | Comment       |
|----------------|---------------------------------------------------------|-------------------------|-------------------|---------------|
| [112]          | Water flooding                                          | Ecology / planet        | Semi-quantitative |               |
| [118]          | Reduce runoff quantity                                  | Environment & Water     | Quantitative      | Best practice |
| <b>Traffic</b> |                                                         |                         |                   |               |
| [107]          | Delay reduction from base year average                  | Mobility / Safety       | Quantitative      |               |
| [102]          | Timing plans developed for weekend or special events    | Transportation planning | Qualitative       | Best practice |
| [124]          | Traffic capacity                                        | Function of transport   | Quantitative      |               |
| [107]          | Transit and High Occupancy Vehicle (HOV) access for all | Access and equity       | Qualitative       | Best practice |
| [111]          | Vehicle traffic congestion                              | Social                  | Quantitative      |               |
